1  
2  
3  
4  
5  
6  
7  
8  
9  
10  
11  
12  
13  
14  
15  
16  
17  
18  
19  
20  
21  
22  
23  
24

**Mapping of safe and early chemo-attenuated live *Plasmodium*  
*falciparum* immunization identifies immune signature of vaccine  
efficacy**

Steffen Borrmann<sup>1,2,3\*</sup>, Zita Sulyok<sup>1,2\*</sup>, Katja Müller<sup>4\*</sup>, Mihaly Sulyok<sup>1,2a</sup>, Rolf Fendel<sup>1,2</sup>, Johannes Friesen<sup>4</sup>, Albert Lalremruata<sup>1,2</sup>, Thaisa Lucas Sandri<sup>1,2</sup>, The Trong Nguyen<sup>1,2</sup>, Carlos Lamsfus Calle<sup>1,2</sup>, Annette Knoblich<sup>1,2</sup>, Javier Ibáñez<sup>1,2</sup>, Freia-Raphaella Lorenz<sup>1,2</sup>, Henri Lynn Heimann<sup>1,2</sup>, David M. Weller<sup>1,2</sup>, Regina Steuder<sup>1,2</sup>, Selorme Adukpo<sup>1,2</sup>, Patricia Granados Bayon<sup>1,2</sup>, Zsófia Molnár<sup>1,2</sup>, Meral Esen<sup>1,2</sup>, Wolfram Metzger<sup>1,2</sup>, Eric. R. James<sup>5</sup>, Adam Ruben<sup>5</sup>, Yonas Abebe<sup>5</sup>, Sumana Chakravarty<sup>5</sup>, Anita Manoj<sup>5</sup>, Natasha KC<sup>6</sup>, Tooba Murshedkar<sup>5</sup>, Julius C.R. Hafalla<sup>7</sup>, Tamirat Gebru Woldearegai<sup>1,2</sup>, Fiona O'Rourke<sup>1,2</sup>, Jana Held<sup>1,2</sup>, Pete Billingsley<sup>5</sup>, B. Kim Lee Sim<sup>5</sup>, Thomas L. Richie<sup>5</sup>, Peter G. Kremsner<sup>1,2,3</sup>, Stephen L. Hoffman<sup>5\*</sup>, Kai Matuschewski<sup>4\*</sup>, Benjamin Mordmüller<sup>1,2,3\*</sup>

<sup>1</sup> Institut für Tropenmedizin, Eberhard Karls University Tübingen, Germany

<sup>2</sup> German Center for Infection Research (DZIF), partner site Tübingen, Germany

<sup>3</sup> Centre de Recherches Médicales de Lambaréné, Gabon

<sup>4</sup> Dept. of Molecular Parasitology, Institute of Biology, Humboldt University, Berlin, Germany

<sup>5</sup> Sanaria Inc., Rockville, MD, USA

<sup>6</sup> Protein Potential LLC, Rockville, MD, USA

<sup>7</sup> Department of Immunology and Infection, Faculty of Infectious and Tropical Diseases, London

School of Hygiene and Tropical Medicine, London, United Kingdom

Borrmann *et al.* Mapping early *Plasmodium* liver stage attenuation

25  
26 \*contributed equally  
27 corresponding authors: Steffen Borrmann (steffen.borrmann@uni-tuebingen.de) and Benjamin  
28 Mordmüller (benjamin.mordmueller@uni-tuebingen.de)  
29  
30 <sup>a</sup> current address: Institute of Pathology and Neuropathology, Eberhard Karls University of  
31 Tübingen  
32

33 **Abstract**

34 Potent protection against malaria can be induced by attenuated live-immunization with  
35 *Plasmodium falciparum* (Pf) sporozoites (SPZ). However, a better understanding of the critical  
36 processes involved in the establishment of protective immunity is needed. We explored the safety  
37 and vaccine efficacy of early chemo-attenuation of PfSPZ under atovaquone-proguanil (AP). AP  
38 caused early arrest of *P. berghei* liver stages. Despite the absence of replication, robust protection  
39 in mice correlated with parasite-specific effector-memory CD8<sup>+</sup> T-cell responses. In a phase I  
40 clinical trial a single dose of AP prevented Pf infections in the liver of adult, human subjects who  
41 received three doses of  $5.12 \times 10^4$  or  $1.5 \times 10^5$  PfSPZ by direct venous inoculation combined with  
42 oral AP. However, only 2 of 8 (25%) and 2 of 10 (20%), respectively, were protected against  
43 controlled human malaria infection (CHMI) 10 weeks after the last vaccine dose, despite levels of  
44 IgG antibodies to the Pf circumsporozoite protein (PfCSP) comparable to those achieved in fully  
45 protected volunteers after immunization with  $5.12 \times 10^4$  PfSPZ with chloroquine chemoprophylaxis  
46 active only against subsequent blood stages. We identify lower IgG recognition of the secreted  
47 liver stage-specific antigens LISP2 and LSA1 and the multi-stage antigen MSP5 as immune  
48 signatures of inferior vaccine efficacy compared to PfSPZ with chloroquine chemoprophylaxis. In  
49 conclusion, we show that immune signatures of liver stage antigens, but neither an established  
50 rodent malaria model nor concentrations of antibodies against the major surface protein of  
51 sporozoites, permit prediction of vaccine efficacy. Thus, this study provides a clear rationale for  
52 the development of live sporozoite vaccination protocols that boost exposure to Pf liver stage  
53 antigens.

54  
55

56 **Significance Statement**

57

58 Our research demonstrates that attenuation of liver infection of high doses of *Plasmodium*  
59 *falciparum* sporozoites by concomitant single-dose administration of atovaquone-proguanil is  
60 safe in humans. However, vaccine efficacy was modest when compared to an identical protocol  
61 using chloroquine that acts only on the subsequent blood infection. Immune signatures of  
62 secreted *P. falciparum* liver stage antigens, but neither an established rodent malaria model nor  
63 concentrations of sporozoite antibodies, permit prediction of vaccine efficacy.

## 64 **Introduction**

65 An unprecedented global effort to fight malaria in all subtropical and tropical regions of the  
66 world has considerably reduced the disease burden. Progress, however, has stalled at an  
67 estimated 200 million cases and 450,000 deaths globally per year (1). Further advances towards  
68 elimination are likely to be facilitated only by an efficient vaccine that complements the existing  
69 conventional control measures such as vector control, long-lasting impregnated bednets and  
70 access to rapid diagnosis and chemotherapy (2).

71 Malaria is caused by single-cell eukaryotes of the genus *Plasmodium*. Morbidity and  
72 mortality result from a rapid, asexual expansion phase in the blood. In the case of *Plasmodium*  
73 *falciparum* (Pf), which accounts for nearly all malaria-related deaths, blood stage parasite biomass  
74 can be substantial and can reach up to  $10^{12}$  infected red blood cells. Asexual blood stage infection,  
75 however, is preceded by a small mosquito-transmitted inoculum of ~10-400 Pf sporozoites (SPZ),  
76 which specifically invade hepatocytes and replicate therein (3). Because this 1-week liver phase  
77 of infection (i) is clinically silent and (ii) represents a life-cycle bottleneck, it provides an early target  
78 for a malaria vaccine that would prevent blood stage infection with malaria parasites and thereby  
79 prevent all disease and transmission stages (4-9).

80 Currently there is no vaccine against malaria parasites or any other eukaryotic human  
81 pathogen, which has received marketing authorization (licensure) by the European Medicines  
82 Agency (EMA) or the U.S. Food and Drug Administration (FDA). However, a partially effective  
83 sub-unit vaccine against malaria (RTS,S/AS01E) (10) has received a favorable scientific opinion  
84 by the EMA regarding its quality, safety and short-term efficacy (11).

85 Superior vaccine efficacy (VE) against Pf malaria as compared to results reported for  
86 subunit vaccines has been demonstrated by intravenous inoculation of radiation-attenuated,  
87 aseptic, purified, cryopreserved PfSPZ, Sanaria® PfSPZ Vaccine (6, 12-15), and intravenous  
88 inoculation of infectious, aseptic, purified, cryopreserved PfSPZ (Sanaria® PfSPZ Challenge) with

Borrmann *et al.* Mapping early *Plasmodium* liver stage attenuation

89 concomitant chemoprophylaxis with chloroquine, Sanaria® PfSPZ-CVac (CQ) (7, 16). Importantly,  
90 initial results indicate higher, per-sporozoite VE of PfSPZ-based vaccine protocols that rely on late  
91 chemo-attenuation such as those using the chemoprophylactic drug chloroquine (CQ) which is  
92 active only against blood stage parasites (7, 17). Based on this, it has been postulated that the  
93 parasite expansion in the liver substantially boosts vaccine potency (7, 17), compared to radiation-  
94 attenuated parasites that undergo developmental arrest soon after hepatocyte invasion. This  
95 strategy however requires that adequate drug concentrations are maintained in the blood beyond  
96 the liver stage period in order to kill the parasites when they emerge from the liver, e.g., by weekly  
97 administration of the antimalarial drug chloroquine (CQ). It also entails the safety risk of exposing  
98 the vaccinee to transient parasitemia and mild symptoms of malaria 7-9 days after immunization.  
99 To increase the safety margin of live-immunizations it would be preferable if the parasites never  
100 emerged from the liver without compromising VE. Moreover, chemoprophylaxis that acts against  
101 liver stages may substantially strengthen a vaccination regimen with concomitant administration  
102 of PfSPZ and chemoprophylaxis and thus, would be a significant step towards a simplified,  
103 pragmatic PfSPZ immunization protocol.

104 Here, we present the results of pre-clinical experiments and a clinical trial exploring the VE  
105 and mechanism of protection of PfSPZ co-administered with the chemoprophylactic drug  
106 combination atovaquone-proguanil (AP). This licensed drug combination was used because in  
107 contrast to CQ, which kills Pf parasites only in infected red blood cells, AP also kills Pf parasites  
108 in the liver before they can emerge into the bloodstream (18-20).

109

110 **Results**

111

112 **Exposure to atovaquone-proguanil leads to early *Plasmodium berghei* liver stage arrest**

113 To initiate our pre-clinical analysis, we determined the *in vitro* effect of a single dose of  
114 atovaquone (A) alone or AP when added to cultured hepatoma cells together with *Plasmodium*  
115 *berghei* (Pb) sporozoites (Fig. 1A). Quantification of liver stage volume, morphology, and number  
116 revealed small, developmentally arrested liver stages (Fig. 1A, Fig. S1B). Notably, A- and AP-  
117 treated parasites persisted for several days, indicative of developmental arrest rather than parasite  
118 death (Fig. S1A). Hepatocyte invasion appeared to be unaffected by drug exposure since the  
119 number of intracellular liver stages was indistinguishable from untreated controls (Fig. S1C).  
120 Causal prophylactic activity was confirmed in a murine malaria model (Fig. 1B, C, D).  
121 Administration of a single dose of 3 mg/kg atovaquone plus 1.2 mg/kg proguanil or 3 mg/kg  
122 atovaquone alone in C57BL/6 mice inoculated with  $10^4$  Pb sporozoites prevented blood stage  
123 infection (Fig. 1B). Quantitative RT-PCR (qRT-PCR) analysis of steady-state levels of Pb18S  
124 rRNA and, for comparison, mouse *GAPDH* mRNA in infected livers 42h after Pb sporozoite and  
125 drug co-administration (Fig. 1C, D) revealed a >1,000-fold reduced liver stage load in drug-treated  
126 mice, in good agreement with our *in vitro* data (Fig. 1A, Fig. S1). Furthermore, when Pb  
127 sporozoites were pre-exposed to AP on ice for 2h, all C57BL/6 mice that received  $10^4$  treated  
128 ( $n=5$ ) or untreated Pb sporozoites ( $n=3$ ) developed blood stage infection after three days,  
129 confirming earlier results of no direct effect on sporozoites (21). Thus, exposure to atovaquone or  
130 atovaquone-proguanil exerts prophylactic activity against Pb liver stage parasites, but not Pb  
131 sporozoites, allowing maximum hepatocyte invasion followed by robust early liver stage arrest.

132

133

134 **Pb sporozoite immunization under atovaquone (-proguanil) cover induces sterile**  
135 **protection and robust IFN $\gamma$ -secreting CD8<sup>+</sup> CD11a<sup>+</sup> T-cell responses**

136 As proof of concept, we next immunized three groups of C57BL/6 mice with 10<sup>4</sup> Pb  
137 sporozoites and concomitant administration of A or AP at weekly intervals (Fig. 2). Mice were  
138 challenged 3-4 weeks after the last immunization dose by intravenous (i.v.) inoculation of 10<sup>4</sup> Pb  
139 sporozoites. Three immunizations at weekly intervals with 10<sup>4</sup> Pb sporozoites and atovaquone  
140 resulted in sterile protection in all (6/6) mice. Remarkably, only two immunizations with Pb  
141 sporozoites and either A or AP still elicited sterile protection in 88% (15/17) of mice and a  
142 substantial delay to blood infection in the two mice that were not protected (Fig. 2A). We  
143 independently confirmed our findings by quantification of liver stage parasites by qRT-PCR (Fig.  
144 2B). After sporozoite challenge parasite liver loads were reduced by at least two orders of  
145 magnitude in immunized animals as compared to controls ( $p < 0.05$ ) (Fig. 2B). Potential residual  
146 effects of drug treatment that could have interfered with assessment of vaccine efficacy (VE) were  
147 ruled out in an independent experiment (Fig. S2).

148 We next quantified signatures of effector-memory CD8<sup>+</sup> T-cell responses that correlate  
149 with protection against challenge with wild-type sporozoites (22, 23) by measuring IFN $\gamma$ -secretion  
150 of CD8<sup>+</sup> CD11a<sup>+</sup> T-cells after stimulation with the peptides SSP2/TRAP<sub>130-138</sub> and S20<sub>318-326</sub>, which  
151 are recognized in immunized H2-K<sup>b</sup>-restricted C57BL/6 mice (24, 25) (Fig. 2C, Figs. S3 and S4).  
152 Mice were immunized with two doses of Pb sporozoites and AP or A, and lymphocytes were  
153 isolated from spleens three or four weeks after the last immunization, respectively. We detected  
154 high levels of antigen-specific IFN $\gamma$  secretion after both immunization protocols (Fig. 2C). Total  
155 numbers of effector memory CD8<sup>+</sup> CD62L<sup>-</sup> T-cells were also enhanced after immunization (Fig.  
156 S4A).



157 Exposure to sporozoite inoculations activates antibody-producing B cells (26-28).  
158 Accordingly, the immunization protocols also induced high ( $\sim 1:10^4$ ) anti-Pb sporozoite antibody  
159 titers (Fig. 2D).

160 In conclusion, the preclinical data demonstrate high chemoprophylactic efficacy of AP  
161 leading to reliable, early arrest of liver stage development when co-administered with Pb  
162 sporozoites. Co-administered AP with intravenous Pb sporozoites as part of an immunization  
163 protocol, resulted in parasite-specific effector-memory CD8<sup>+</sup> T-cell responses and robust  
164 protection against challenge infections. Of note, vaccine efficacy was markedly superior to another  
165 early-arrest protocol with primaquine and indeed, comparable to the most potent chemo-  
166 attenuation protocols tested so far (29), prompting the design of a clinical trial.

167

#### 168 **Clinical trial of PfSPZ-CVac (atovaquone-proguanil)**

169 Based on the positive pre-clinical results we conducted a randomized, double-blind,  
170 placebo-controlled clinical trial of PfSPZ-CVac (AP) from September 2016 to November 2017 at  
171 the Institute for Tropical Medicine in Tübingen, Germany (Malaria controlled human infection trial  
172 E, MALACHITE; ClinicalTrials.gov Identifier: NCT02858817). The study population was selected  
173 to represent healthy, malaria-naïve volunteers aged 18–45 years from Tübingen and the  
174 surrounding area. In total, 30 volunteers (15 per dosage/group) were enrolled; 15 in Group A  
175 (PfSPZ reference dose) and 15 in Group B (PfSPZ 3-fold higher dose). They were randomly  
176 allocated to receive three injections of Sanaria® PfSPZ Challenge (aseptic, purified,  
177 cryopreserved PfSPZ of the NF54 strain, n=10 in each group) or normal saline placebo (n=5 in  
178 each group) per dosage group (30, 31).

179 In Group A, participants received three doses of  $5.12 \times 10^4$  PfSPZ by direct venous  
180 inoculation (DVI) at 4-week intervals and oral administration of a single dose of AP (1,000 mg/400  
181 mg) within one hour before each PfSPZ inoculation. In Group B, participants received  $1.5 \times 10^5$

Borrmann *et al.* Mapping early *Plasmodium* liver stage attenuation

182 PfSPZ with the same schedule and chemoprophylactic regimen. Ten weeks after last  
183 immunization, participants in both groups underwent controlled human malaria infection (CHMI)  
184 by DVI of  $3.2 \times 10^3$  PfSPZ of PfSPZ Challenge (NF54).

185 Twenty-seven participants were included in the per-protocol analysis. Three withdrawals  
186 occurred, all of them in Group A before CHMI; one requested by the participant and two  
187 withdrawals by the investigators based on non-compliance or non-availability for critical study  
188 procedures. An additional participant in Group A was lost to follow-up after CHMI and was included  
189 in the per-protocol analysis. This volunteer developed parasitemia and started treatment on day  
190 12 post-CHMI. Following successful completion of antimalarial treatment, thick blood smear (TBS)  
191 and qPCR were negative on day 21 post-CHMI. On day 22 post-CHMI the volunteer was not  
192 reachable and refused further follow-up visits. The study flow chart is shown in Fig. S5. Baseline  
193 population characteristics are detailed in Table S1.

194 Importantly, during immunization no breakthrough parasitemia by qPCR occurred,  
195 demonstrating robust causal prophylactic activity of a single-dose of 1,000 mg/400 mg AP, even  
196 with an inoculum of  $1.5 \times 10^5$  PfSPZ. This sporozoite dose greatly exceeds the infective dose of  
197  $3.2 \times 10^3$  PfSPZ (31, 32) by ~50 times and is estimated to be equivalent to the bites of ~200 infected  
198 mosquitoes. Of note, safety and tolerability during immunization were similar between placebo  
199 controls and vaccinees (Table S1).

200 Upon challenge by CHMI, 6 out of 8 vaccinees in group A and all 4 placebo recipients  
201 developed Pf parasitemia (VE, 25%; 95% CI, -12%-50%). Due to the low efficacy and according  
202 to protocol, no heterologous repeat CHMI was performed. Subsequently, Group B underwent  
203 homologous CHMI with PfSPZ Challenge (NF54), i.e., with the vaccine strain only. In Group B, 8  
204 of 10 vaccinees and all 5 placebo controls developed Pf parasitemia (VE, 20%; 95% CI, -9%-  
205 41%). Moreover, time to qPCR detectable parasitemia, a marker for partial efficacy, was similar

206 between the groups (Group A; median 7 days; IQR 7-8.5 and Group B; median 7 days; IQR 7-7.5;  
207 Kruskal-Wallis H test,  $p=0.27$ ) (Fig. 3 and Fig. 4).

208

### 209 **Anti-PfCSP antibodies generated by early arrest of PfSPZ-CVac immunization**

210 The 25% and 20% VE observed after 3 doses of  $5.12 \times 10^4$  or  $1.5 \times 10^5$  PfSPZ of PfSPZ-  
211 CVac (AP), respectively, contrasts sharply with the 100% VE we achieved with 3 doses of  
212  $5.12 \times 10^4$  PfSPZ of PfSPZ-CVac (CQ)(7). To better understand the immunological basis for these  
213 differences in VE, we first analyzed the levels of IgG antibodies generated by vaccination against  
214 the Pf circumsporozoite protein (PfCSP) two weeks after the 3<sup>rd</sup> dose of vaccine and just prior to  
215 CHMI (Fig. 5). The median serum dilution corresponding to an optical density of 1.0, termed net  
216 OD 1.0, two weeks after the last dose of PfSPZ-CVac (AP) was 300 (range, 80 to 4,000) for the  
217 8 subjects who underwent CHMI in vaccine Group A and 3,800 (range 1,400 to 67,100) for the 9  
218 subjects who underwent CHMI in the previous PfSPZ-CVac (CQ) study (7), which used the same  
219 dose of  $5.12 \times 10^4$  PfSPZ (Table S3)( $p < 0.05$ , Wilcoxon-Mann-Whitney U Test, 2-tailed).

220 This >10-fold reduction in anti-PfCSP antibody levels in the PfSPZ-CVac (AP) group was  
221 unexpected. Since we can firmly exclude batch-to-batch variation during the manufacturing  
222 process by GMP-mandated quality control procedures, which includes quantification of sporozoite  
223 numbers, motility and invasion capacity, this finding is consistent with a scenario, in which the  
224 immune systems of subjects immunized with PfSPZ-CVac (AP) are exposed to less PfCSP than  
225 those immunized with PfSPZ-CVac (CQ).

226 Next we assessed anti-PfCSP antibodies in the higher dose group. Increasing the three  
227 PfSPZ doses to  $1.5 \times 10^5$  PfSPZ of PfSPZ-CVac (AP) significantly increased median anti-PfCSP  
228 antibodies two weeks after the 3<sup>rd</sup> immunization to 7,300 (range, 1,100 to 20,000,  $p < 0.01$ , Mann-  
229 Whitney U Test, 2-tailed) (Fig. 5, Table S3). However, despite the > 20-fold increase in PfCSP  
230 antibodies in group B there was no increase in VE. We note that the VE of 20% was significantly

231 lower than the 100% VE after immunization with  $5.12 \times 10^4$  PfSPZ of PfSPZ-CVac (CQ) ( $p < 0.001$ ,  
232 Barnard's test, 2-tailed). The correlation between antibody concentration prior to CHMI and  
233 inoculum were similar (Table S3). Strikingly, the higher levels of anti-PfCSP antibody  
234 concentrations in Group B were not predictive of VE after CHMI (Fig. 5). These results are  
235 consistent with an anti-PfCSP antibody-independent mechanism of protection after immunization  
236 with PfSPZ-CVac (CQ).

237

### 238 **Profiling of IgG antibody responses to sporozoite, liver stage, and asexual blood stage** 239 **antigens**

240 We hypothesized that reduced protection with PfSPZ-CVac (AP) compared to PfSPZ-  
241 CVac (CQ) was due to the early arrest of liver stage development by AP. This pharmaceutical  
242 arrest is expected to result in significantly reduced exposure to liver stage and blood antigens.  
243 To this end, we probed a representative range of IgG antibody responses with a custom protein  
244 microarray (33). We detected a striking absence of a few distinct antibody responses in  
245 volunteers who received PfSPZ-CVac (AP) compared to PfSPZ-CVac (CQ) (ref.), while the  
246 breadth and intensity of immunoreactivity to 216 other antigens was indistinguishable (Fig. 6A,  
247 B). In perfect agreement with the ELISA results (Fig. 5A), IgG responses to PfCSP were  
248 considerably higher in volunteers with PfSPZ-CVac (AP) compared to PfSPZ-CVac (CQ) (Fig. 5  
249 and Fig. 6C), likely reflecting higher exposure to sporozoites in the high-dose group of PfSPZ-  
250 CVac (AP) ( $1.5 \times 10^5$  vs  $5.12 \times 10^4$ , respectively). Most importantly, IgG antibody responses to the  
251 two well-known secreted liver stage antigens LISP2 and LSA1 were significantly reduced in  
252 recipients of PfSPZ-CVac (AP) (Fig. 5B, C and Supplementary Table S4). Together, our IgG  
253 profiling data shows that inferior vaccine efficacy of the PfSPZ-CVac (AP) protocol correlates  
254 with low responses to liver stage antigens, whereas superior IgG responses to PfCSP are not  
255 predictive of protection.

256 **Discussion**

257 Intra-host replication is a key feature of many live attenuated vaccines. This expansion  
258 correlates with improved protective immunity against natural exposure (34). For instance, the  
259 Sabin poliomyelitis vaccine proved that a polio virus strain capable of replicating in the gut but not  
260 the nervous system can generate robust neutralizing anti-viral immunity (34). Similarly, it has been  
261 proposed that intra-host replication of live, attenuated, PfSPZ-based vaccines might substantially  
262 boost the per-parasite VE (5, 7, 16, 35-38).

263 The current benchmark in humans for highly protective malaria vaccines is immunization  
264 with whole PfSPZ, which relies on radiation-, chemo- or genetic attenuation of live, metabolically  
265 active PfSPZ (38-41). Immunization with radiation-attenuated (6) and chemo-attenuated (7)  
266 PfSPZ vaccines has induced robust and sustained VE in humans against CHMIs for up to 14  
267 months (14, 15) and natural exposure to Pf in the field for at least 6 months (13). Vaccine  
268 development has, however, mostly been empirical, and a better understanding of the critical  
269 processes involved in the establishment of protective immunity is needed to guide further  
270 development of this vaccine strategy.

271 In Pf, the initial massive (20,000-40,000 fold), but clinically silent, liver stage expansion of  
272 parasite biomass and antigenic breadth provides ample opportunities for arresting infections prior  
273 to the subsequent pathogenic blood stage. Here, we tested the potential of an attenuation protocol  
274 based on AP, a licensed antimalarial drug combination with liver stage activity used for the  
275 treatment and chemoprophylaxis of Pf malaria. We proposed that this drug partner would improve  
276 the *in vivo* chemo-attenuation strategy significantly because: i) chemoprophylaxis would be  
277 administered only concomitantly with PfSPZ increasing safety and practicality, whereas CQ  
278 prophylaxis starts prior to PfSPZ injection and is continued with weekly doses until after the last  
279 vaccination; ii) there would be no egress of the parasites from the liver, and thus, no possibility of  
280 malaria symptoms associated with transient asexual erythrocytic stage parasitemia, which occur

Borrmann *et al.* Mapping early *Plasmodium* liver stage attenuation

281 with doses beyond  $10^5$  PfSPZ; and iii) AP is better tolerated and safer than 4-aminoquinolines,  
282 such as CQ.

283 We demonstrated in the murine malaria model that atovaquone alone and AP led to a  
284 complete early arrest of liver stage development. Compared to untreated controls drug-exposed  
285 intrahepatic Pb parasites did not begin to replicate as evidenced by single-nucleated liver stage  
286 forms observed *in vitro* and by >100-fold reduced parasite liver loads. Of importance, this robust  
287 liver arrest was confirmed in the subsequent clinical trial, in which a single dose of AP completely  
288 prevented blood stage infections after each of three immunizations with  $1.5 \times 10^5$  PfSPZ of PfSPZ  
289 Challenge.

290 Previously, full protection was elicited by three doses of  $5.12 \times 10^4$  PfSPZ and chemo-  
291 attenuation with CQ (7), which only kills Pf parasites that have emerged from the liver and have  
292 commenced subsequent intraerythrocytic replication. In stark contrast, only 2 out of 8 volunteers,  
293 who received three doses of  $5.12 \times 10^4$  PfSPZ with AP chemoprophylaxis, were protected against  
294 CHMI with  $3.2 \times 10^3$  PfSPZ of PfSPZ Challenge. Even a 3-fold increase in the PfSPZ numbers per  
295 dose to three doses of  $1.5 \times 10^5$  PfSPZ failed to induce significant protection despite the robust  
296 dose-dependency of PfSPZ-based vaccines (6, 7). Levels of anti-PfCSP antibodies on the day of  
297 CHMI in volunteers immunized with three doses of  $1.5 \times 10^5$  PfSPZ were at least as high as levels  
298 induced by three immunizations with  $5.12 \times 10^4$  PfSPZ in the PfSPZ-CVac (CQ) group previously  
299 reported (7). In marked contrast, we observed a considerable reduction of IgG antibody responses  
300 to the two well-characterized liver stage antigens LISP2 and LSA1. Even though these lower  
301 antibody responses may mostly reflect reduced exposure, and not necessarily a protective  
302 mechanism, in the PfSPZ-CVac (AP) group compared to the PfSPZ-CVac (CQ) group, it is  
303 tempting to speculate that T-cell dependent antibody responses could be a surrogate of cellular  
304 immunity. Importantly, unlike our earlier study (7), the comparison of similar PfSPZ doses of  
305 PfSPZ-CVac (AP) and PfSPZ-CVac (CQ) allowed us to entangle the effects of sporozoite dose

Borrmann *et al.* Mapping early *Plasmodium* liver stage attenuation

306 and liver stage maturation, resulting in a clear separation of responses that appear to reflect  
307 sporozoite exposure (anti-PfCSP IgG) from responses associated with biological processes  
308 critical for protection (anti-LISP2 and anti-LSA1 IgG). Taken together, our data indicate that, high-  
309 level VE ( $\geq 80\%$ ) 10 weeks after the last immunizing dose induced by immunization with 3 doses  
310 of  $5.12 \times 10^4$  to  $1.5 \times 10^5$  infectious PfSPZ under chemoprophylaxis appears to depend on intra-  
311 hepatic replication of PfSPZ.

312 We cannot formally exclude that AP has heretofore undefined immunosuppressive activity  
313 in humans as reported for CQ (42). We consider this notion unlikely since over more than 20 years  
314 of clinical use of AP no such evidence has been reported. The observed discrepancy between the  
315 VE achieved with sporozoite immunization under AP in the murine and human studies (full vs.  
316 modest protection, respectively) is likely related to the shorter duration of the Pb liver stage ( $\sim 2$   
317 days) compared to the Pf liver stage ( $\sim 7$  days). We also noted a largely reduced anti-PfCSP  
318 antibody response in) group A vaccinees in comparison to an identical ( $5.12 \times 10^4$ ) PfSPZ dose in  
319 PfSPZ-CVac (CQ) vaccinees (7). A plausible explanation is that PfCSP is produced and acts as  
320 an immunogen not only in extracellular PfSPZ but also throughout Pf liver stage development,  
321 coherent with robust CSP expression during liver stage maturation in murine malaria models (43,  
322 44). Accordingly, the full liver stage maturation achieved by PfSPZ-CVac (CQ) immunization as  
323 compared to lack of maturation after PfSPZ-CVac (AP) immunization is a likely cause for the  
324 marked differences in anti-PfCSP antibody levels after immunization with the same total number  
325 of PfSPZ.

326 We propose that our results indicate an essential role for intrahepatic replication, either  
327 through increased amounts of antigen and/or increased numbers of antigens, for achieving  
328 maximum protection against CHMI. Furthermore, protection appears to be unrelated to the high  
329 anti-PfCSP antibody levels that have been observed previously after high PfSPZ dose  
330 immunizations (7). This lack of correlation with antibody responses is supported by data presented

Borrmann *et al.* Mapping early *Plasmodium* liver stage attenuation

331 here and in previous murine studies showing that the protection induced by radiation-, chemo-,  
332 and genetically -attenuated SPZ immunization is strictly dependent on CD8<sup>+</sup> T-cells (5, 45, 46).  
333 Although direct activity of human CD8<sup>+</sup> T-cells against Pf liver stages in humans has not been  
334 demonstrated, our data thus support the hypothesis that cellular immune mechanisms are central  
335 to VE of chemo-attenuated PfSPZ vaccines. Further immunological studies are warranted to  
336 elucidate the mechanistic basis and identify immune correlates of vaccine-induced protection in  
337 humans. It is, of course, conceivable that dependency on intra-host replication can be overcome  
338 by administering even higher doses of PfSPZ Challenge with AP, as it has for radiation-attenuated  
339 PfSPZ (6, 12, 14, 15), but clinical evaluation of live parasite immunization strategies that combine  
340 safe parasite attenuation with superior VE should remain a research priority.

341 In conclusion, we have demonstrated that generation of full protection against homologous  
342 CHMI in humans at an immunizing dose of  $5.12 \times 10^4$  to  $1.5 \times 10^5$  PfSPZ of PfSPZ Challenge  
343 appears to depend on intra-host expansion of Pf, which correlated with an immune signature of  
344 anti-liver stage responses. Neither an established rodent malaria model nor anti-PfCSP antibody  
345 levels were predictive of sterilizing immunity.

346



347 **Methods**

348

349 *In vitro and animal experiments*

350 All animal work was conducted in accordance with the German Animal Welfare Act  
351 (Tierschutzgesetz in der Fassung vom 18. Mai 2006, BGBl. I S. 1207), which implements the  
352 directive 86/609/EEC from the European Union and the European Convention for the protection  
353 of vertebrate animals used for experimental and other scientific purposes. The protocol was  
354 approved by the ethics committee of MPI-IB and the Berlin state authorities (LAGeSo Reg#  
355 G0469/09, G0294/15). Female C57BL/6 and NMRI mice at the age of 6 to 8 weeks were  
356 purchased from Charles River (Sulzfeld, Germany) for sporozoite injections and blood stage  
357 passages, respectively.

358

359 *Plasmodium berghei* parasites

360 For all experiments *P. berghei* (Pb) ANKA clone 507, which constitutively expresses the  
361 green fluorescent protein (GFP) under control of the *eIF1a* promoter (47), was used. To generate  
362 sporozoites, female *Anopheles stephensi* mosquitoes were infected by a bloodmeal on Pb-  
363 infected NMRI mice. Starting 17 days after infection, salivary glands were hand-dissected from  
364 infected mosquitoes, gently ground, and sporozoites harvested after centrifugation. Freshly  
365 dissected Pb sporozoites ( $10^4$ ) were added to complete DMEM medium (10%FCS, 1% Pen/Strep)  
366 containing atovaquone (0.2  $\mu$ M; Wellvone® Suspension, 750 mg/5ml; GlaxoSmithKline) or  
367 Malarone® (0.2  $\mu$ M atovaquone, 0.08  $\mu$ M proguanil hydrochloride; GlaxoSmithKline) or the  
368 equivalent amounts of DMSO (0.01%) as negative control. Irradiated Pb sporozoites and  
369 untreated Pb sporozoites served as control. Sporozoites were added to cultured Huh7 cells in  
370 duplicates. Hepatoma cells were incubated for one hour at 37°C for sporozoite sedimentation and  
371 for additional 2 hours to permit sporozoite entry. Infected cultures were subsequently washed

Borrmann *et al.* Mapping early *Plasmodium* liver stage attenuation

372 repeatedly with DMEM complete medium to remove residual drug. Next, infected cells were  
373 incubated in complete DMEM medium for 48 h, 69 h or 114 h at 37°C before fixation in 4% para-  
374 formaldehyde. Fixed cells were stained with a monoclonal anti-PbHSP70 antibody (48) to visualize  
375 parasites, with a rabbit anti-PbUIS4 serum (49) to visualize the parasitophorous vacuole, and with  
376 Hoechst 33342 (Invitrogen) that stains nuclei. As secondary antibodies goat Alexa Fluor 488–  
377 labeled antibody to mouse immunoglobulin G (IgG) and goat Alexa Fluor 546–labeled antibody to  
378 rabbit immunoglobulin G (IgG) (Invitrogen) were used. Image analysis and quantification was  
379 performed by fluorescence microscopy using either a Leica DM2500 or a Zeiss Axio Vision  
380 microscope. Images were processed with Fiji (Image J, NIH, Bethesda, USA).

381

382 *P. berghei* sporozoite infection, immunization, and challenge experiments

383 To test whether single dose administrations of atovaquone or atovaquone-proguanil prevent  
384 a subsequent Pb blood stage infection and thus, life-threatening pathology, C57BL/6 mice were  
385 intravenously (i.v.) infected with  $10^4$  Pb sporozoites, and one dose of drug was co-administered  
386 intraperitoneally (i.p.). Drug doses were 3 mg/kg atovaquone alone or 3 mg/kg atovaquone plus  
387 1.2 mg/kg proguanil hydrochloride. Three days later infections were monitored daily by  
388 microscopic examination of Giemsa-stained blood films. To test toxicity of atovaquone-proguanil  
389 on sporozoites, sporozoites were treated with 1  $\mu$ M atovaquone-0.4  $\mu$ M proguanil-hydrochloride  
390 in complete DMEM for 2 hours and then washed with RPMI followed by inoculation of  $10^4$  treated  
391 Pb sporozoites to naïve mice. For quantification of pre-erythrocytic parasite development by qRT-  
392 PCR livers were removed 42 hours after sporozoite infection and transferred to TRIZOL<sup>®</sup> for RNA  
393 isolation. Complementary DNA (cDNA) synthesis and qRT-PCR were done as described  
394 previously (4). Briefly, the mean  $C_t$  value of the *Pb18S* ribosomal subunit RNA (*18SrRNA*; gene  
395 ID: 160641) was normalized to the mean  $C_t$  of mouse *GAPDH* mRNA values (gene ID: 281199965)  
396 using the  $\Delta\Delta C_t$  method. qPCR experiments were performed with the ABI 7500 sequence detection

Borrmann *et al.* Mapping early *Plasmodium* liver stage attenuation

397 system and done in triplicates. For immunizations, female C57BL/6 mice were inoculated twice or  
398 three times at seven-day intervals with  $10^4$  Pb salivary gland sporozoites i.v. together with one  
399 dose of drug administered i.p. as described for the chemoprophylaxis studies. Three to five weeks  
400 after the last immunization mice were challenged by intravenous injection of  $10^4$  Pb salivary gland  
401 sporozoites. Naïve, age-matched mice served as infection controls. For determination of sterile  
402 protection, blood parasitemia was monitored by microscopic examination of Giemsa-stained blood  
403 films daily from day 3 until day 20. Alternatively, the parasite liver load after challenge was  
404 quantified by qRT-PCR.

405

406 *Anti-sporozoite antibody titers*

407 For titration of *P. berghei*-specific antibodies in mouse serum, salivary gland-associated  
408 sporozoites were deposited on glass slides, air-dried and fixed in acetone. After rehydration in PBS  
409 and blocking, mouse serum was titrated by serial dilutions and bound antibodies detected with a  
410 secondary goat anti-mouse Alexa Fluor 546-coupled antibody (1:1,000). Nuclei were stained with  
411 Hoechst 33342 (1:1,000).

412

413 *Anti-CSP antibody titers*

414 IgG antibodies to the Pf circumsporozoite protein (PfCSP) were assessed by enzyme linked  
415 immunosorbent assay (ELISA) as previously described (7). 96-well plates (Nunc Maxisorp  
416 Immuno Plate) were coated overnight at 4 °C with 2.0 µg of the recombinant *P. falciparum* (Pf)  
417 circumsporozoite protein (rPfCSP, Lot#122006) protein in 50 µL coating buffer (KPL) per well in  
418 coating buffer (KPL). Plates were washed three times with 2 mM imidazole, 160 mM NaCl, 0.02%  
419 Tween 20, 0.5 mM EDTA and blocked with 1% Bovine Serum Albumin (BSA) blocking buffer (KPL)  
420 containing 1% non-fat dry milk for 1 h at 37 °C. Plates were washed three times and serially diluted  
421 serum samples (in triplicate) were added and incubated at 37 °C for 1 h. After three washes,

Borrmann *et al.* Mapping early *Plasmodium* liver stage attenuation

422 peroxidase labelled goat anti-human IgG (KPL) was added at a dilution of 0.1  $\mu\text{g}/\text{mL}$  and  
423 incubated at 37 °C for 1 h. Plates were washed three times, ABTS peroxidase substrate was  
424 added for plate development, and the plates were incubated for 75 mins at 22°C room  
425 temperature. The plates were read with a Spectramax Plus384 microplate reader (Molecular  
426 Devices) at 405 nm. The data were collected using Softmax Pro GXP v5 and fit to a 4-parameter  
427 logistic curve, to calculate the serum dilution at OD 1.0. A negative control (pooled serum from  
428 non-immune individuals from a malaria-free area) was included in all assays. Serum from an  
429 individual with anti-PfCSP antibodies for PfCSP was used as positive control.

430

431 *Protein microarray and analysis*

432 Microarrays were produced at the University of California Irvine, Irvine, California, USA (33). In  
433 total, 262 Pf proteins were expressed using an *E. coli* lysate *in vitro* expression system and spotted  
434 on a 16-pad ONCYTE AVID slide, representing 228 important Pf antigens known to frequently  
435 appear in sterile and naturally acquired immunity against the parasite (50, 51).

436 For the detection of binding antibodies, secondary IgG antibody (goat anti-human IgG QDot™800,  
437 Grace Bio-Labs #110635), secondary IgM antibody (biotin-SP-conjugated goat anti-human IgM,  
438 Jackson ImmunoResearch #109-065-043) and Qdot™585 streptavidin conjugate (Invitrogen  
439 #Q10111MP) were used. Study serum samples as well as a European control serum pool were  
440 diluted 1:50 in 0.05X Super G Blocking Buffer (Grace Bio-Labs, Inc.) containing 10% *E. coli* lysate  
441 (GenScript, Piscataway, NJ) and incubated for 30 minutes on a shaker at room temperature (RT).  
442 Meanwhile, microarray slides were rehydrated using 0.05X Super G Blocking buffer at RT.  
443 Rehydration buffer was subsequently removed and samples added onto the slides. Arrays were  
444 incubated overnight at 4°C on a shaker (180 rpm). Serum samples were removed the following  
445 day and microarrays were washed using 1X TBST buffer (Grace Bio-Labs, Inc.). Secondary  
446 antibodies were then applied at a dilution of 1:200 and incubated for two hours at RT on the shaker,

Borrmann *et al.* Mapping early *Plasmodium* liver stage attenuation

447 followed by another washing step and a one-hour incubation in a 1:250 dilution of Qdot™585  
448 streptavidin conjugate. After a final washing step, slides were dried by centrifugation at 500 g for  
449 10 minutes. Slide images were taken using the ArrayCAM® Imaging System (Grace Bio-Labs)  
450 and the ArrayCAM 400-S Microarray Imager Software. Microarray data was analyzed in R  
451 statistical software package version 3.6.2. All images were manually checked for any noise signal.  
452 Each antigen spot signal was corrected for local background reactivity by applying a normal-  
453 exponential convolution model (52) using the “saddle” -algorithm for parameter estimation  
454 (available in the limma package v3.28.14) (53). Data was log<sub>2</sub>-transformed and further normalized  
455 by subtraction of the median signal intensity of mock expression spots on the particular array to  
456 correct for background activity of antibodies binding to *E. coli* lysate. Differential antibody levels in  
457 the different allocated study outcomes (placebo, non-protected and protected vaccinees) were  
458 detected by Student’s t-test. Antigens with p<0.05 and a fold change>2 of mean signal intensities  
459 were defined as differentially recognized between the tested sample groups.

460

461 *Quantification of antigen-specific CD8<sup>+</sup> T-cell responses*

462 For CD8<sup>+</sup> T-cell stimulations followed by intracellular cytokine staining (ICS), splenic  
463 lymphocytes were stimulated with 10 μM SSP2/TRAP<sub>130-138</sub> or S20<sub>318-326</sub> peptides (24) for 5 hours  
464 at 37°C in the presence of brefeldin A (1:1,000). Cells were stained with fluorescently-labeled anti-  
465 mouse CD8 [53-6.7], CD62L [MEL14], or CD11a [M17/4] antibodies (eBioscience). Following  
466 fixation with 4% paraformaldehyde, cells were stained intracellularly with fluorescently-labeled  
467 anti-mouse IFN-γ [R4-6A2] antibody (eBioscience) in permeabilization buffer (BD Bioscience).  
468 Antibodies were incubated 60 min at 4°C. After washing and transfer to 1% paraformaldehyde/  
469 PBS cells were quantified using a LSRII flow cytometer (BD Bioscience). Data analysis was  
470 performed using FlowJo (Tree Star Inc., Oregon, USA).

471

472 *Clinical trial*

473 This trial was approved by the ethics committee of the Eberhard Karls University and the  
474 University Hospital Tübingen as well as by the Paul Ehrlich Institute (Langen, Germany) and the  
475 Regional Council (Regierungspräsidium Tübingen). The study was compliant with the  
476 International Council for Harmonisation Good Clinical Practice guidelines and the German  
477 Medicinal Product Act (Arzneimittelgesetz, AMG). The trial was registered at ClinicalTrials.gov  
478 (NCT02858817).

479 This single center, double-blind, randomized, placebo-controlled phase 1 clinical trial was  
480 conducted from September 2016 to November 2017 at the Institute of Tropical Medicine in  
481 Tübingen, Germany. The study population was selected to represent healthy, malaria-naïve  
482 adults. Volunteers aged 18–45 years from Tübingen and surrounding area with a body-mass index  
483 (BMI) between 18 kg/m<sup>2</sup> and 30 kg/m<sup>2</sup> were included. Female participants were required to  
484 practice effective contraception and to provide a negative pregnancy test. Further inclusion criteria  
485 included: being reachable at all times by mobile phone during the whole study, agreement to share  
486 medical information about the volunteer with his or her general practitioner, and understanding of  
487 study procedures and risks, assessed by a quiz. Additionally, willingness to undergo CHMI with  
488 PfSPZ Challenge, to take a curative regimen of antimalarial if necessary, and the ability to comply  
489 with all study requirements (in the investigator's opinion) were also required.

490 Exclusion criteria were: a history of malaria or plans to travel to endemic regions during the  
491 study, receiving any investigational product in another clinical trial within 90 days before enrolment  
492 or planned receipt during the study, previous participation in a malaria vaccine trial, history of  
493 serious psychiatric conditions, convulsions, or severe head trauma, any malignancy, and diabetes  
494 mellitus. Moreover, falling in moderate risk or higher categories for fatal or non-fatal cardiovascular  
495 event within 5 years (54), prolonged QTc interval (>450 ms), or any other clinically significant  
496 abnormalities in the electrocardiogram, breast feeding, or intention to become pregnant, HIV,

Borrmann *et al.* Mapping early *Plasmodium* liver stage attenuation

497 hepatitis B or C virus infection, alcohol or drug abuse, any suspected immunodeficient state,  
498 history of splenectomy, and haemoglobinopathies also prevented participation. A complete list of  
499 eligibility criteria is available as an online supplement. Eligibility criteria were assessed after written  
500 informed consent was given.

501 Fifteen volunteers per group were enrolled and randomized to receive Sanaria® PfSPZ  
502 Challenge for immunization or normal saline placebo with an allocation ratio of 2:1 for  
503 vaccine:placebo. In Group A, participants received  $5.12 \times 10^4$  PfSPZ of PfSPZ Challenge (NF54)  
504 by DVI three times at four week intervals and a single dose of AP (1,000 mg/400 mg) administered  
505 orally within one hour before each immunization. In Group B participants received  $1.5 \times 10^5$  PfSPZ  
506 of PfSPZ Challenge (NF54) by DVI with the same scheduling and chemoprophylactic regimen.

507 Ten weeks after the last immunization, the first CHMI was performed in both groups for  
508 vaccine efficacy (VE) testing. CHMI was done by DVI of  $3.2 \times 10^3$  PfSPZ of PfSPZ Challenge  
509 (NF54). Active follow-up of the participants was conducted through 56 days after the injection of  
510 PfSPZ Challenge for CHMI. The protocol stipulated two successive CHMIs, the first at 10 weeks  
511 and the second at 16-44 weeks. The sequence of CHMI was planned to be PfSPZ Challenge  
512 (NF54, homologous clone) followed by PfSPZ Challenge (7G8, heterologous clone) for Group A.  
513 The sequence for Group B was to be based on VE following first CHMI in Group A: NF54 followed  
514 by 7G8 when VE against homologous CHMI was <75%, 7G8 followed by 7G8 when VE was  $\geq 75\%$ .  
515 Due to the low efficacy of the first CHMI also in group B a second CHMI was not performed in  
516 Group B. First CHMI was thus performed with PfSPZ Challenge (NF54) for both groups.

517 PfSPZ Challenge (NF54) is comprised of aseptic, purified, cryopreserved NF54 PfSPZ,  
518 produced by Sanaria Inc. (Rockville, US). PfSPZ Challenge was stored and transported in liquid  
519 nitrogen vapor phase at -150 to -196°C. Formulation and reconstitution was made in Tübingen on  
520 the day of infection. Volunteers were inoculated within 30 minutes after thawing of PfSPZ  
521 Challenge. Sterile isotonic normal saline, identical in appearance to PfSPZ Challenge was used

Borrmann *et al.* Mapping early *Plasmodium* liver stage attenuation

522 as placebo. A volume of 0.5 mL of vaccine or placebo was injected into an arm vein by DVI through  
523 a 25 gauge needle. After each immunization, participants were monitored for at least 60 minutes  
524 before leaving the clinic for local and systemic adverse events. Participants were assessed on site  
525 for safety and to measure parasitemia on days 1, 5, 7, 10, 14 and 21 after each immunization, and  
526 on day 1, 6-21, 28, 56 after CHMI. Medically qualified study personnel were available continually  
527 for unscheduled visits. Antimalarial treatment, according to the German guidelines (55) for the  
528 treatment of uncomplicated Pf malaria (AP or artemether-lumefantrine as first-line drugs) was to  
529 be initiated, in the event of breakthrough parasitemia with symptoms during immunization or in the  
530 case of parasitemia following CHMI. Breakthrough parasitemia was defined as microscopically  
531 detectable parasitemia during immunization with at least two symptoms consistent with malaria  
532 for 2 days despite chemoprophylaxis. Protection was defined as the absence of parasites in the  
533 peripheral blood for 28 days following CHMI. Parasitemia after CHMI was assessed on daily basis  
534 from day 6 to day 21 and again on day 28 via thick blood smear (TBS) and quantitative PCR.  
535 Treatment was administered upon occurrence of three consecutive positive PCR results one of  
536 them at least 100 Pf parasites/ml from samples taken at least 12 hours apart or the first TBS  
537 positivity. An additional follow-up visit for safety was conducted on day 56. Participants were  
538 encouraged to immediately report adverse events between the scheduled follow-up visits.

539 If a volunteer was withdrawn from the study after receiving a dose of PfSPZ Challenge at  
540 one or more of the three immunizations or at CHMI, a full, appropriate, curative course of  
541 antimalarial therapy was administered.

542 In both groups 10 volunteers were randomly allocated to receive immunizations with PfSPZ  
543 Challenge and 5 volunteers to receive normal saline placebo (PfSPZ Challenge (NF54):placebo  
544 = 2:1). Group membership was allocated using a Mersenne-Twister random number generator  
545 implemented in R. A third party outside the study team generated and distributed the  
546 randomization list. A dedicated member of the formulation team, who was not involved in volunteer



547 management or diagnostic activities, kept the randomization envelopes and dosing schedule.

548 The primary aim of the study was to assess the safety and VE of repeated immunization by  
549 DVI of PfSPZ Challenge under AP chemoprophylaxis in malaria naïve adults. The primary VE  
550 endpoint was the proportion of protected volunteers.

551 Protection was defined as the absence of parasites in the peripheral blood for 28 days  
552 following first CHMI with PfSPZ Challenge. To assess safety outcomes, Grade 3 and 4 adverse  
553 events (AEs) and serious adverse events (SAEs) were captured from time of first administration  
554 of A/P until the end of the study. Functional characterization of humoral and cellular immune  
555 responses were exploratory endpoints.

556

#### 557 *Statistical analysis and power calculation of clinical trial*

558 To be able to show, with a power of 80% and a two-tailed alpha of 5%, that 25% or less of  
559 immunized volunteers and 95% of controls, allocated in a 2:1 ratio became infected by CHMI, 10  
560 immunized and 5 placebo-treated volunteers per group were required. Hence, a total of 30 (10  
561 each for  $5.12 \times 10^4$  and  $1.5 \times 10^5$  PfSPZ Challenge (NF54) with AP and 10 placebo) volunteers were  
562 required. The sample size was calculated using the nBinomial function in the gsDesign package.

563 No formal hypothesis testing was done for safety and tolerability data. Safety and tolerability  
564 data are presented as descriptive analyses in listings and graphically. VE was calculated by  
565 comparison of proportions between immunized and placebo-treated volunteers using an  
566 unconditional exact test (Boschloo's test) and time-to-parasitemia using a log-rank (LR) test.  
567 Multiple non-parametric group comparisons were performed by using the Kruskal-Wallis (KW) H  
568 test. The level of significance was set at a two-tailed type 1 error alpha <5%. All statistical analyses  
569 were performed using R version 3.4.4 and GraphPad Prism 5. Kaplan-Meier curves were  
570 compared by a log-rank (Mantel Cox) test. Statistical significance of parasite sizes, qPCR data,  
571 and flow cytometric analyses were assessed using the Mann-Whitney U test for nonparametric

Borrmann *et al.* Mapping early *Plasmodium* liver stage attenuation

572 test samples.  $P$  values of  $P < 0.05$  were considered as significant.

573

574

575

576 **Acknowledgments**

577 Funding for the clinical trial was provided by the German Centre for Infection Research (DZIF).

578 We are grateful for the support provided in part by National Institutes of Allergy and Infectious

579 Diseases, National Institutes of Health (USA), SBIR grants 5R44AI055229 and 2R44AI058375

580 to SLH. The preclinical work was supported by a DFG grant (SFB 544) to SB and KM and by the

581 Max Planck Society to KM. The clinical trial was funded by AKF grant 346-0-0.

582 We wish to acknowledge the volunteers participating in the clinical trial. We also gratefully

583 acknowledge the contribution of the manufacturing, quality, regulatory and clinical teams at

584 Sanaria.

585 Authors listed as Sanaria affiliates are all full time employees of Sanaria Inc., Rockville MD.

586 Author contributions:

587 Design: SB, SLH, TLR, PGK, KMa, BM

588 Principal Investigator and clinical trial sponsor representative: PGK

589 Writing: SB, MS, KMü, ZS, RF, FOR, TLR, PGK, SLH, KMa, BM

590 Preclinical experiments: KMü, JF, JH

591 Clinical trial: MS, ZS, AL, TLS, TTN, JI, HLH, DMW, RS, SA, PGB, ZM, ME, WM, TG, FOR, JH

592 GMP: ERJ, AR, YA, SC, AM, NKC, PB, BKLS

593 Pharmaceutical Operations: ERJ, AR, YA, AM, NKC, BKLS, CLC, AK

594 Immunology: KMü, JH, NKC, SC, RF, FRL

595

596

597 **References**

598

- 599 1. WHO (2019) Malaria Report 2019. (World Health Organisation, Geneva).
- 600 2. malERA Consultative Group on Vaccines, A research agenda for malaria eradication:  
601 vaccines. *Plos Med* **8**, e1000398 (2011).
- 602 3. J. C. Beier, J. R. Davis, J. A. Vaughan, B. H. Noden, M. S. Beier, Quantitation of  
603 *Plasmodium falciparum* sporozoites transmitted in vitro by experimentally infected  
604 *Anopheles gambiae* and *Anopheles stephensi*. *Am J Trop Med Hyg* **44**, 564-570 (1991).
- 605 4. A. K. Mueller, M. Labaied, S. H. Kappe, K. Matuschewski, Genetically modified  
606 *Plasmodium* parasites as a protective experimental malaria vaccine. *Nature* **433**, 164-  
607 167 (2005).
- 608 5. J. Friesen *et al.*, Natural immunization against malaria: causal prophylaxis with  
609 antibiotics. *Science Translational Medicine* **2**, 40ra49 (2010).
- 610 6. R. A. Seder *et al.*, Protection against malaria by intravenous immunization with a  
611 nonreplicating sporozoite vaccine. *Science* **341**, 1359-1365 (2013).
- 612 7. B. Mordmüller *et al.*, Sterile protection against human malaria by chemoattenuated  
613 PfSPZ vaccine. *Nature* **542**, 445-449 (2017).
- 614 8. S. L. Hoffman *et al.*, Protection of humans against malaria by immunization with  
615 radiation-attenuated *Plasmodium falciparum* sporozoites. *J Infect Dis* **185**, 1155-1164  
616 (2002).
- 617 9. S. L. Hoffman *et al.*, Development of a metabolically active, non-replicating sporozoite  
618 vaccine to prevent *Plasmodium falciparum* malaria. *Hum Vaccin* **6**, 97-106 (2010).
- 619 10. RTSS Clinical Trials Partnership, Efficacy and safety of RTS,S/AS01 malaria vaccine  
620 with or without a booster dose in infants and children in Africa: final results of a phase 3,  
621 individually randomised, controlled trial. *Lancet* **386**, 31-45 (2015).

Borrmann *et al.* Mapping early *Plasmodium* liver stage attenuation

- 622 11. B. Greenwood, O. K. Doumbo, Implementation of the malaria candidate vaccine  
623 RTS,S/AS01. *Lancet* **387**, 318-319 (2016).
- 624 12. J. E. Epstein *et al.*, Protection against *Plasmodium falciparum* malaria by PfSPZ Vaccine.  
625 *JCI Insight* **2**, e89154 (2017).
- 626 13. M. S. Sissoko *et al.*, Safety and efficacy of PfSPZ Vaccine against *Plasmodium*  
627 *falciparum* via direct venous inoculation in healthy malaria-exposed adults in Mali: a  
628 randomised, double-blind phase 1 trial. *Lancet Infect Dis* **17**, 498-509 (2017).
- 629 14. A. S. Ishizuka *et al.*, Protection against malaria at 1 year and immune correlates following  
630 PfSPZ vaccination. *Nat Med* **22**, 614-623 (2016).
- 631 15. K. E. Lyke *et al.*, Attenuated PfSPZ Vaccine induces strain-transcending T cells and  
632 durable protection against heterologous controlled human malaria infection. *Proc Natl*  
633 *Acad Sci U S A* **114**, 2711-2716 (2017).
- 634 16. G. J. Bastiaens *et al.*, Safety, immunogenicity, and protective efficacy of intradermal  
635 immunization with aseptic, purified, cryopreserved *Plasmodium falciparum* sporozoites in  
636 volunteers under chloroquine prophylaxis: a randomized controlled trial. *Am J Trop Med*  
637 *Hyg* **94**, 663-673 (2016).
- 638 17. M. Roestenberg *et al.*, Protection against a malaria challenge by sporozoite inoculation.  
639 *N Engl J Med* **361**, 468-477 (2009).
- 640 18. C. S. Davies, M. Pudney, P. J. Matthews, R. E. Sinden, The causal prophylactic activity  
641 of the novel hydroxynaphthoquinone 566C80 against *Plasmodium berghei* infections in  
642 rats. *Acta Leiden* **58**, 115-128 (1989).
- 643 19. P. D. Radloff, J. Philipps, M. Nkeyi, D. Hutchinson, P. G. Kremsner, Atovaquone and  
644 proguanil for *Plasmodium falciparum* malaria. *Lancet* **347**, 1511-1514 (1996).

Borrmann *et al.* Mapping early *Plasmodium* liver stage attenuation

- 645 20. G. A. Deye *et al.*, Prolonged protection provided by a single dose of atovaquone-  
646 proguanil for the chemoprophylaxis of *Plasmodium falciparum* malaria in a human  
647 challenge model. *Clin Infect Dis* **54**, 232-239 (2012).
- 648 21. R. E. Fowler, R. E. Sinden, M. Pudney, Inhibitory activity of the anti-malarial atovaquone  
649 (566C80) against ookinetes, oocysts, and sporozoites of *Plasmodium berghei*. *J*  
650 *Parasitol* **81**, 452-458 (1995).
- 651 22. D. Berenzon *et al.*, Protracted protection to *Plasmodium berghei* malaria is linked to  
652 functionally and phenotypically heterogeneous liver memory CD8+ T cells. *J Immunol*  
653 **171**, 2024-2034 (2003).
- 654 23. I. A. Cockburn *et al.*, Dendritic cells and hepatocytes use distinct pathways to process  
655 protective antigen from *Plasmodium* in vivo. *PLoS Pathog* **7**, e1001318 (2011).
- 656 24. J. C. Hafalla *et al.*, Identification of targets of CD8(+) T cell responses to malaria liver  
657 stages by genome-wide epitope profiling. *PLoS Pathog* **9**, e1003303 (2013).
- 658 25. K. Müller, M. P. Gibbins, K. Matuschewski, J. C. R. Hafalla, Evidence of cross-stage  
659 CD8+ T cell epitopes in malaria pre-erythrocytic and blood stage infections. *Parasite*  
660 *Immunol* **39**, e12434 (2017).
- 661 26. E. H. Nardin *et al.*, Plasmodium falciparum polyoximes: highly immunogenic synthetic  
662 vaccines constructed by chemoselective ligation of repeat B-cell epitopes and a universal  
663 T-cell epitope of CS protein. *Vaccine* **16**, 590-600 (1998).
- 664 27. M. Rodrigues, R. S. Nussenzweig, F. Zavala, The relative contribution of antibodies,  
665 CD4+ and CD8+ T cells to sporozoite-induced protection against malaria. *Immunology*  
666 **80**, 1-5 (1993).
- 667 28. V. Offeddu, V. Thathy, K. Marsh, K. Matuschewski, Naturally acquired immune  
668 responses against *Plasmodium falciparum* sporozoites and liver infection. *Int J Parasitol*  
669 **42**, 535-548 (2012).

Borrmann *et al.* Mapping early *Plasmodium* liver stage attenuation

- 670 29. J. Friesen, K. Matuschewski, Comparative efficacy of pre-erythrocytic whole organism  
671 vaccine strategies against the malaria parasite. *Vaccine* **29**, 7002-7008 (2011).
- 672 30. M. Roestenberg *et al.*, Controlled human malaria infections by intradermal injection of  
673 cryopreserved *Plasmodium falciparum* sporozoites. *Am J Trop Med Hyg* **88**, 5-13 (2013).
- 674 31. B. Mordmuller *et al.*, Direct venous inoculation of *Plasmodium falciparum* sporozoites for  
675 controlled human malaria infection: a dose-finding trial in two centres. *Malar J* **14**, 117  
676 (2015).
- 677 32. G. P. Gomez-Perez *et al.*, Controlled human malaria infection by intramuscular and direct  
678 venous inoculation of cryopreserved *Plasmodium falciparum* sporozoites in malaria-naive  
679 volunteers: effect of injection volume and dose on infectivity rates. *Malar J* **14**, 306  
680 (2015).
- 681 33. D. L. Doolan *et al.*, Profiling humoral immune responses to *P. falciparum* infection with  
682 protein microarrays. *Proteomics* **8**, 4680-4694 (2008).
- 683 34. P. D. Minor, Live attenuated vaccines: Historical successes and current challenges.  
684 *Virology* **479-480**, 379-392 (2015).
- 685 35. S. Borrmann, K. Matuschewski, Targeting *Plasmodium* liver stages: better late than  
686 never. *Trends Mol Med* **17**, 527-536 (2011).
- 687 36. S. Borrmann, K. Matuschewski, Protective immunity against malaria by 'natural  
688 immunization': a question of dose, parasite diversity, or both? *Curr Opin Immunol* **23**,  
689 500-508 (2011).
- 690 37. N. S. Butler *et al.*, Superior antimalarial immunity after vaccination with late liver stage-  
691 arresting genetically attenuated parasites. *Cell Host & Microbe* **9**, 451-462 (2011).
- 692 38. T. L. Richie *et al.*, Progress with *Plasmodium falciparum* sporozoite (PfSPZ)-based  
693 malaria vaccines. *Vaccine* **33**, 7452-7461 (2015).

Borrmann *et al.* Mapping early *Plasmodium* liver stage attenuation

- 694 39. E. M. Bijker *et al.*, Novel approaches to whole sporozoite vaccination against malaria.  
695 *Vaccine* **33**, 7462-7468 (2015).
- 696 40. S. L. Hoffman, J. Vekemans, T. L. Richie, P. E. Duffy, The march toward malaria  
697 vaccines. *Vaccine* **33 Suppl 4**, D13-23 (2015).
- 698 41. K. Matuschewski, Vaccines against malaria-still a long way to go. *FEBS Journal* **284**,  
699 2560-2568 (2017).
- 700 42. D. Chen *et al.*, Chloroquine modulates antitumor immune response by resetting tumor-  
701 associated macrophages toward M1 phenotype. *Nat Commun* **9**, 873 (2018).
- 702 43. A. K. Mueller *et al.*, *Plasmodium* liver stage developmental arrest by depletion of a  
703 protein at the parasite-host interface. *Proc Natl Acad Sci U S A* **102**, 3022-3027 (2005).
- 704 44. A. P. Singh *et al.*, *Plasmodium* circumsporozoite protein promotes the development of  
705 the liver stages of the parasite. *Cell* **131**, 492-504 (2007).
- 706 45. N. W. Schmidt *et al.*, Memory CD8 T cell responses exceeding a large but definable  
707 threshold provide long-term immunity to malaria. *Proc Natl Acad Sci U S A* **105**, 14017-  
708 14022 (2008).
- 709 46. J. E. Epstein *et al.*, Live attenuated malaria vaccine designed to protect through hepatic  
710 CD8(+) T cell immunity. *Science* **334**, 475-480 (2011).
- 711 47. C. J. Janse, B. Franke-Fayard, A. P. Waters, Selection by flow-sorting of genetically  
712 transformed, GFP-expressing blood stages of the rodent malaria parasite, *Plasmodium*  
713 *berghei*. *Nature Protocols* **1**, 614-623 (2006).
- 714 48. M. Tsuji, D. Mattei, R. S. Nussenzweig, D. Eichinger, F. Zavala, Demonstration of heat-  
715 shock protein 70 in the sporozoite stage of malaria parasites. *Parasitol Res* **80**, 16-21  
716 (1994).
- 717 49. G. N. Montagna *et al.*, Antigen export during liver infection of the malaria parasite  
718 augments protective immunity. *mBio* **5**, e01321-01314 (2014).



Borrmann *et al.* Mapping early *Plasmodium* liver stage attenuation

- 719 50. T. Kobayashi *et al.*, Distinct antibody signatures associated with different malaria  
720 transmission intensities in Zambia and Zimbabwe. *mSphere* **4**, e00061-00019 (2019).
- 721 51. J. M. Obiero *et al.*, Antibody biomarkers associated with sterile protection induced by  
722 controlled human malaria infection under chloroquine prophylaxis. *mSphere* **4**, e00027-  
723 00019 (2019).
- 724 52. J. D. Silver, M. E. Ritchie, G. K. Smyth, Microarray background correction: maximum  
725 likelihood estimation for the normal-exponential convolution. *Biostatistics* **10**, 352-363  
726 (2009).
- 727 53. M. McGee, Z. Chen, Parameter estimation for the exponential-normal convolution model  
728 for background correction of affymetrix GeneChip data. *Statistical Applications in*  
729 *Genetics and Molecular Biology* **5**, Article24 (2006).
- 730 54. M. P. van Meer *et al.*, Idiopathic acute myocarditis during treatment for controlled human  
731 malaria infection: a case report. *Malar J* **13**, 38 (2014).
- 732 55. Deutsche Gesellschaft für Tropenmedizin und Internationale Gesundheit (DTG) (2016)  
733 Leitlinie: Diagnostik und Therapie der Malaria.
- 734
- 735

736 **Figure legends**

737  
738 **Fig. 1. Early arrest of *Plasmodium berghei* liver stage development after co-administration**  
739 **of live sporozoites and atovaquone or atovaquone-proguanil.**

740 (A) Composite fluorescence micrographs of *Plasmodium berghei* (Pb) liver stages in cultured  
741 hepatoma cells. Shown are representative images of liver stages 48h after infection with  
742 sporozoites. During the first 3h cultures were exposed to atovaquone (A), atovaquone-proguanil  
743 (AP) or buffer only. Parasites were visualized by fluorescent staining of the cytoplasm (green; anti-  
744 PbHSP70 antibody), the parasitophorous vacuolar membrane (red; anti-PbUIS4 anti-serum), and  
745 nuclei (blue; Hoechst 33342). Scale bars: 10  $\mu$ m.

746 (B) Kaplan-Meier analysis of the proportion of C57BL/6 mice that remained blood film-negative  
747 after a single intravenous dose of  $10^4$  *P. berghei* sporozoites without drug (black line;  $n=5$ ) or co-  
748 administration of 3 mg/kg A (blue line) or 3/1.2 mg/kg AP (red line). Shown are cumulative data  
749 from two (A co-administration) and five (AP co-administration) independent experiments ( $n \geq 5$  mice  
750 each).

751 (C, D) Liver parasite load 42h after infection of C57BL/6 mice with  $10^4$  sporozoites and co-  
752 administration of (C) 3 mg/kg A (blue circles) or (D) 3/1.2 mg/kg AP (red circles) or no drug (white  
753 circles). Shown are mean values ( $\pm$ S.D.) of relative RNA levels of Pb18S rRNA normalized to  
754 mouse *GAPDH* ( $n \geq 5$ ). \*\*,  $p < 0.01$  (Mann-Whitney U test)

755  
756 **Fig 2. Robust protection against sporozoite challenge infections and antigen-specific**  
757 **immune responses after sporozoite/atovaquone (-proguanil) immunization**  
758 **immune responses after sporozoite/atovaquone (-proguanil) immunization**

759 (A) Kaplan-Meier analysis of protection in mice immunized by co-administration of sporozoites  
760 and a single dose of atovaquone (A; 3 mg/kg i.p.) or atovaquone-proguanil (AP; 3/1.2 mg/kg i.p.).  
761 Mice were either immunized twice (AP co-administration, red line;  $n=11$ ; A co-administration, blue

762 line;  $n=6$ ) or three times (A co-administration, dark blue line;  $n=6$ ). Naïve mice served as controls  
763 (black line;  $n=14$ ). Sporozoite challenge was done by i.v. injection of  $10^4$  sporozoites three to four  
764 weeks after the last immunization.

765 (B) Quantification of parasite liver loads after challenge infection. Mice were immunized twice (A  
766 co-administration,  $n=5$ , blue circles; AP co-administration;  $n=5$ , red circles) and three times (A co-  
767 administration,  $n=6$ , dark blue circle) as in (B). Naïve mice served as controls ( $n=6$  and 4,  
768 respectively, white circles). Challenge infection was done by i.v. injection of  $10^4$  sporozoites at  
769 least three weeks after the last immunization. Livers were harvested 42h later and parasite RNA  
770 quantified by RT-PCR. Relative RNA levels of Pb18S rRNA were normalized to mouse *GAPDH*.  
771 Shown are mean values ( $\pm$ S.D.). \*\*:  $p < 0.01$  (Mann-Whitney U test).

772 (C) Quantification of SSP2/TRAP<sub>130-138</sub> peptide-specific IFN $\gamma$ -secretion by CD8<sup>+</sup> CD11a<sup>+</sup> T-cells  
773 from spleens of immunized or control mice ( $n \geq 5$  each). Shown are mean values ( $\pm$ S.D.). \*\*,  $p <$   
774 0.01 (Mann-Whitney U Test).

775 (D) Quantification of anti-sporozoite antibody titers from serum of immunized or control mice ( $n \geq 5$   
776 each). Shown are mean values ( $\pm$ S.D.). \*\*,  $p < 0.01$  (Mann-Whitney U Test).

777  
778 **Fig. 3. qPCR-assessed Pf parasitemia kinetics in clinical trial participants after CHMI.**

779 Shown is the quantification of Pf blood stage parasite load ( $\log_{10}$  per ml blood) by qPCR over time  
780 after CHMI in the 9 individuals from the placebo control group (top), the 6 non-protected individuals  
781 in group A (reference PfSPZ vaccine dose; center) and the 8 non-protected individuals in group B  
782 (high PfSPZ vaccine dose; bottom). Curves in different colors depict parasite densities over time  
783 in individual participants. Treatment was initiated upon reaching the pre-defined parasitemia  
784 endpoint.

785  
786

787 **Fig. 4. Time to patency after CHMI of participants in groups A and B.**

788 Shown are Kaplan-Meier curves of time to initiation of treatment upon reaching a pre-defined  
789 parasitemia endpoint. CHMI was done at week 10 after the last immunization in all volunteers,  
790 with the exception of one volunteer in Group A (verum) and B (placebo) each, who underwent  
791 CHMI at 17 weeks and 14 weeks, respectively. Both were treated for blood infections on day 10  
792 and 12 after CHMI and were included in the graph.

793  
794 **Fig. 5. Antibodies to PfCSP 2 weeks after the third dose of vaccine in the current trial**

795 **(Malachite = PfSPZ-CVac [AP]) compared to data from a previous trial (TÜCHMI-002 =**  
796 **PfSPZ-CVac [CQ]) (7).** Lines represent the median and 25<sup>th</sup> and 75<sup>th</sup> quartile levels. Filled circles  
797 represent individuals, who did not develop Pf parasitemia (protected), and open circles represent  
798 individuals who did develop Pf parasitemia (unprotected). Note that anti-PfCSP antibody levels  
799 did not predict VE during CHMI. OD 1.0 is the serum dilution at which the optical density was 1.0.  
800 Net OD 1.0 is the OD 1.0 2 weeks after the third dose of vaccine minus the OD 1.0 prior to  
801 immunization.

802  
803 **Fig. 6. Antibody response measured by protein microarrays comparing reactivities of the**

804 **two vaccination regimen PfSPZ-CVac (AP) and PfSPZ-CVac (CQ).** Sera from all volunteers  
805 collected before immunization (baseline, D-1) and one day before challenge (C-1) were applied  
806 on protein microarrays at a 1:50 dilution containing 262 Pf proteins representing 228 unique  
807 antigens. Analysis was performed on C-1 data after subtraction of the individual baseline  
808 reactivity. (A) Bar charts of mean reactivity in the two vaccine regimen, ordered by descending  
809 signal intensities for PfSPZ-CVac (CQ) and subset of highest mean changes (> 2-fold change)  
810 from both vaccine protocols. Array data were normalized, log<sub>2</sub>-transformed and baseline  
811 reactivity was subtracted. (B) Volcano plot to analyze differential immunoreactivity in the two

Borrmann *et al.* Mapping early *Plasmodium* liver stage attenuation

812 trials. Antigen reactivity in verum donors of PfSPZ-CVac [AP] (to the right) was compared to the  
813 verum donors of PfSPZ-CVac [CQ] (dose  $5.12 \times 10^4$  PfSPZ) (to the left). Differentially recognized  
814 antigens (p value  $< 0.05$  and fold change  $> 2$ ) are depicted in red. (C) Box plot of signature IgG  
815 responses in PfSPZ-CVac (AP) (stratified by vaccine dose) and PfSPZ-CVac (CQ) (dose  
816  $5.12 \times 10^4$  PfSPZ). Asterisks indicate statistical significance (Rolf/Freya: please indicate p values  
817 or remove double and triple asterisks).

Borrmann *et al.* Mapping early *Plasmodium* liver stage attenuation

818 **Figure 1.**

819 **A**

820

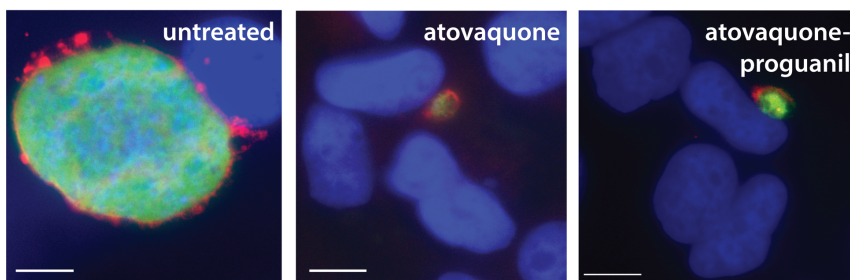

**B**

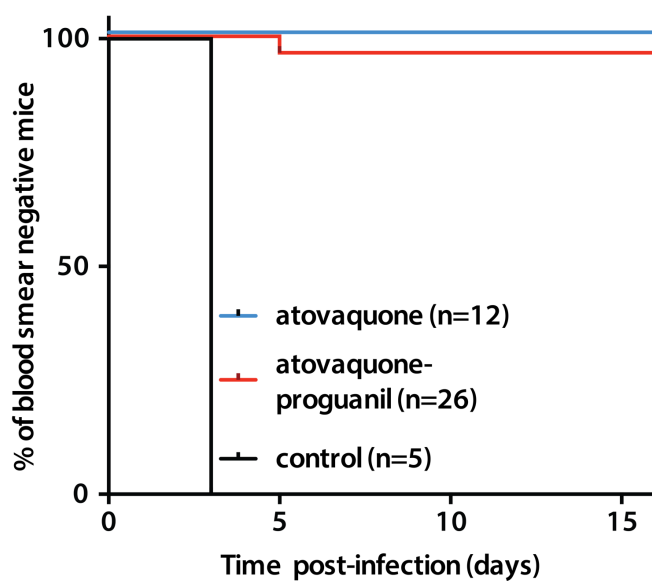

**C**

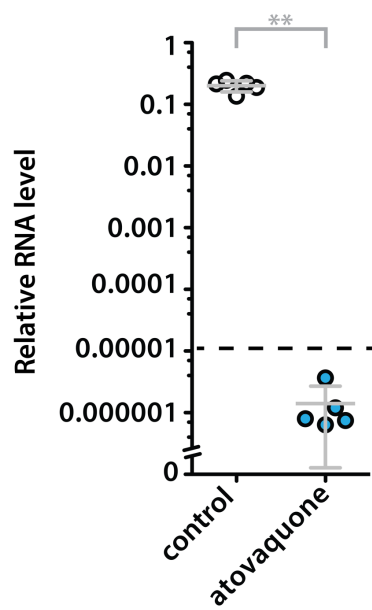

**D**

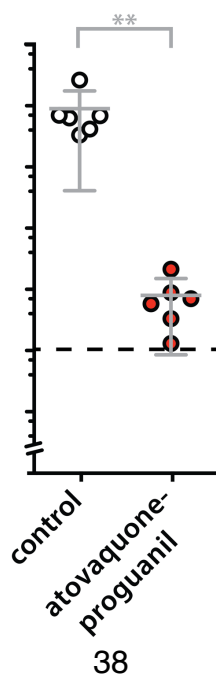

Borrmann *et al.* Mapping early *Plasmodium* liver stage attenuation

821 **Figure 2.**

822 **A**

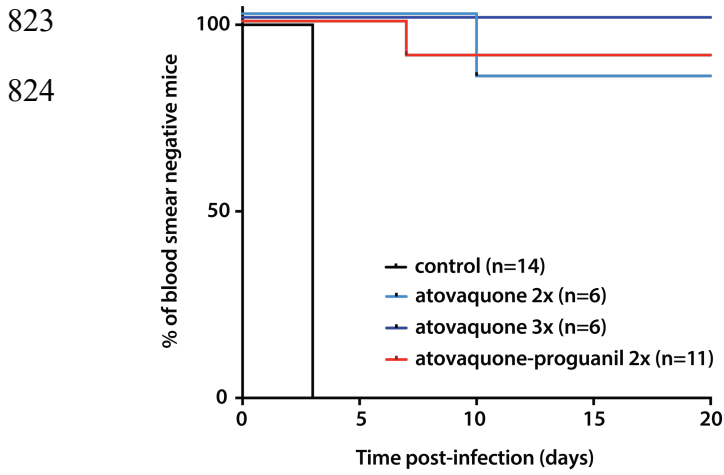

**B**

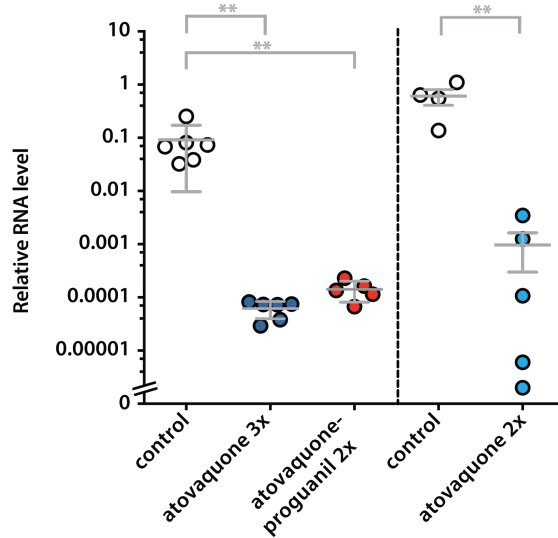

**C**

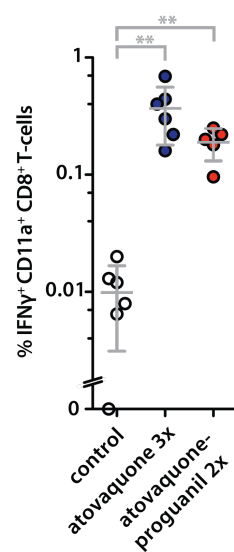

**D**

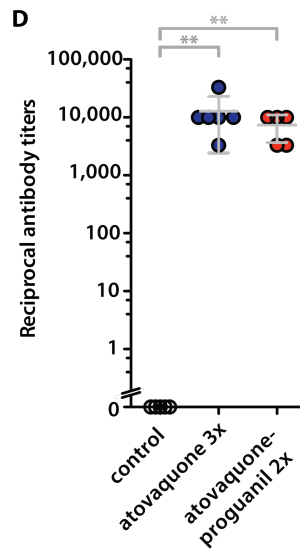

Borrmann *et al.* Mapping early *Plasmodium* liver stage attenuation

825 **Figure 3.**

826

827

828

829

830

831

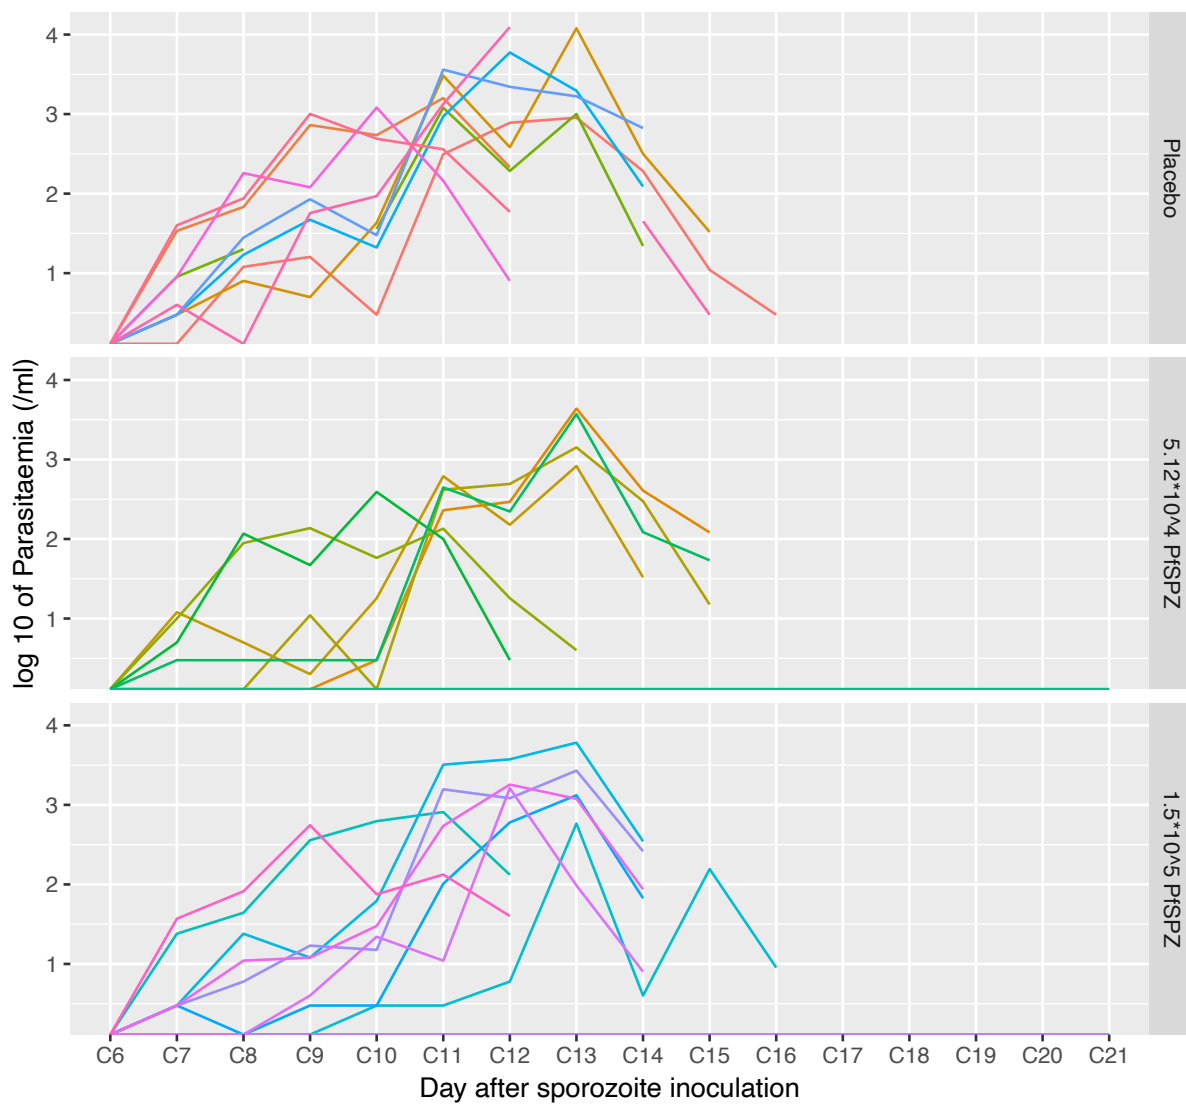



Borrmann *et al.* Mapping early *Plasmodium* liver stage attenuation

832 **Figure 4.**

833

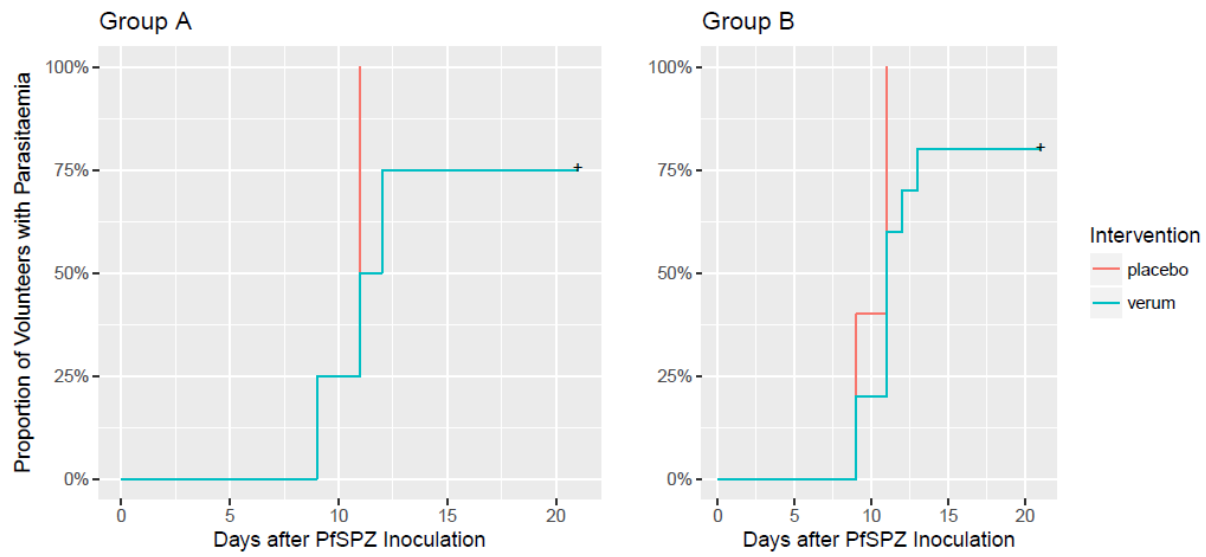

834

835

Borrmann *et al.* Mapping early *Plasmodium* liver stage attenuation

836 **Figure 5.**

837

838

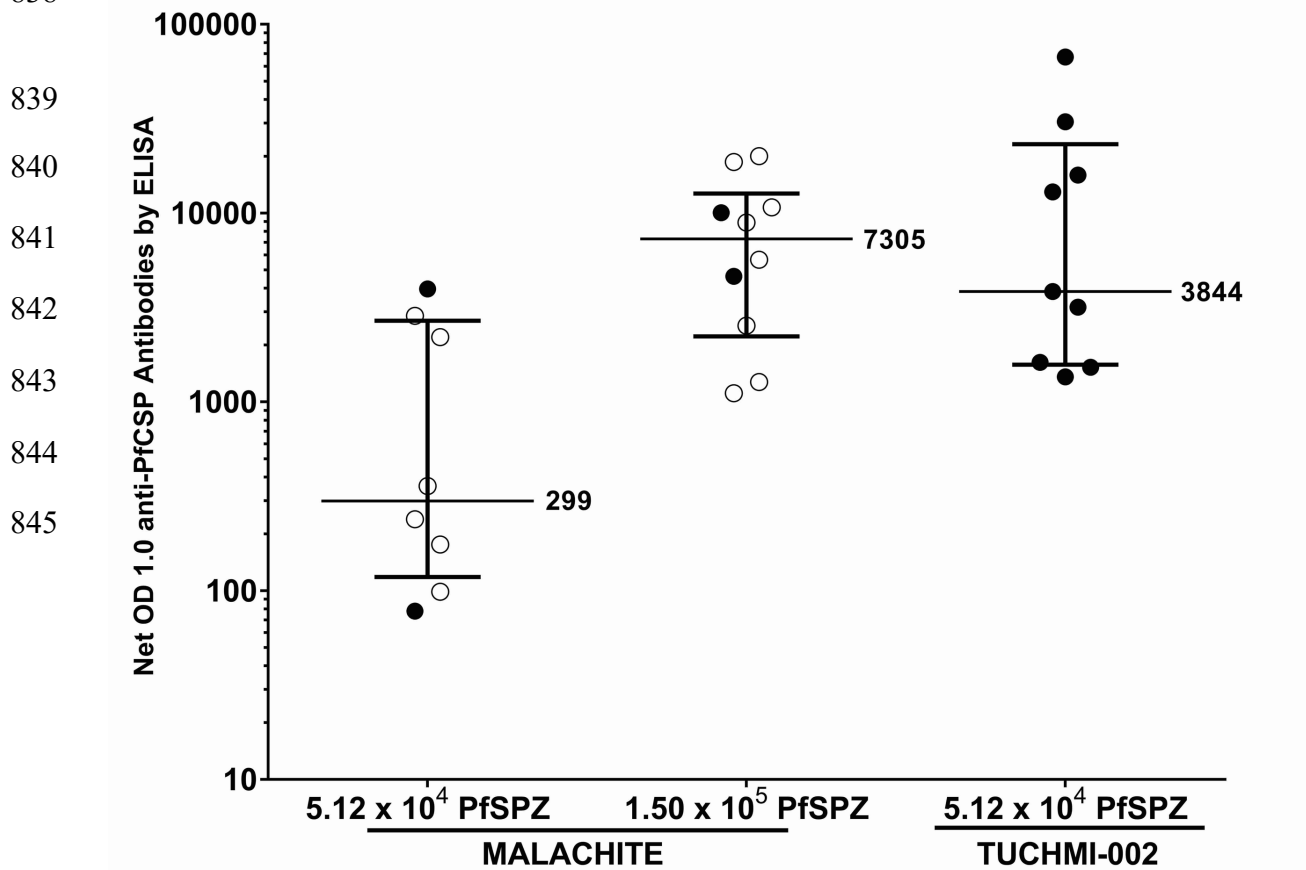

Borrmann *et al.* Mapping early *Plasmodium* liver stage attenuation

846 **Figure 6A.**

847

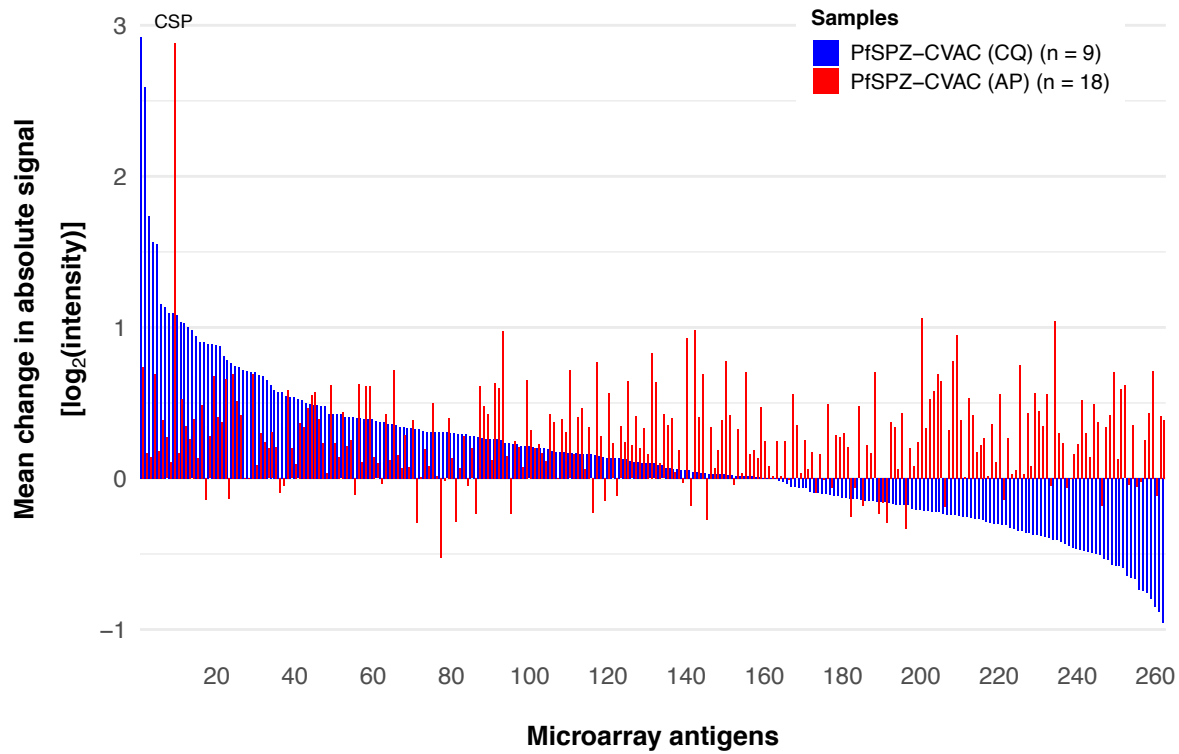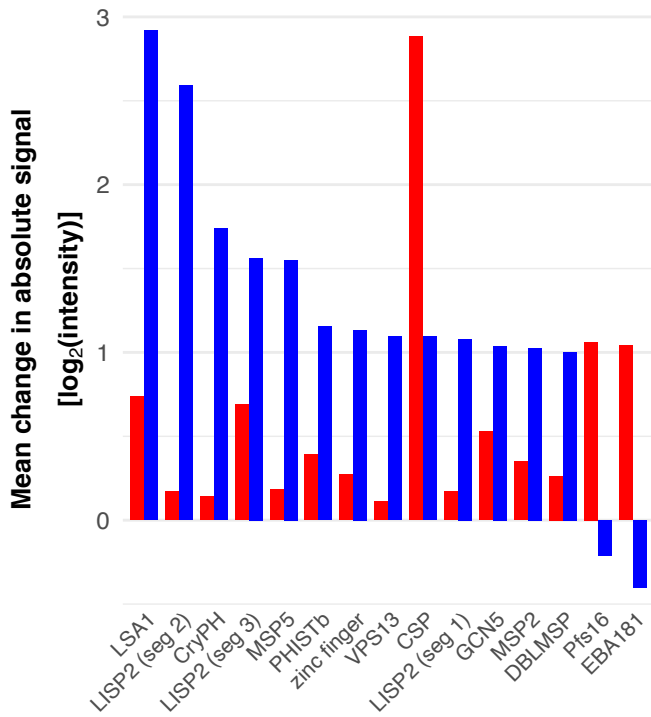

848 **Figure 6B.**

849

850

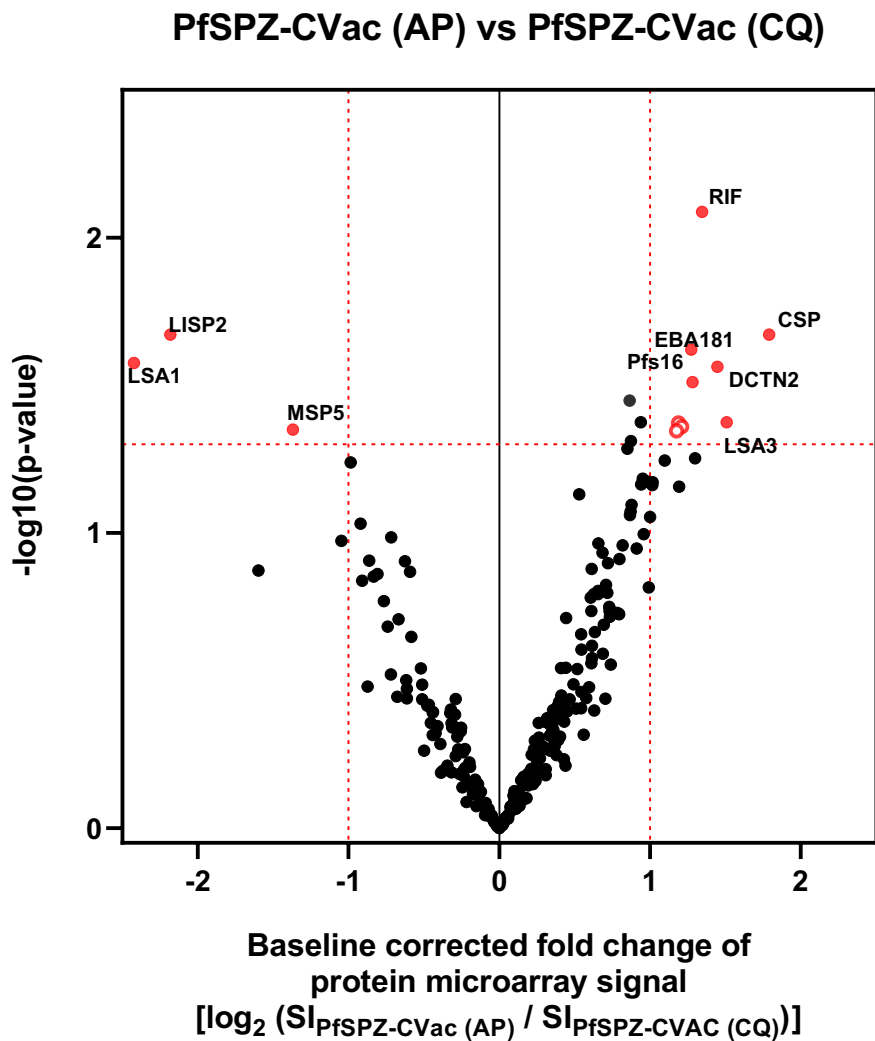

Borrmann *et al.* Mapping early *Plasmodium* liver stage attenuation

851 **Figure 6C.**

852

853

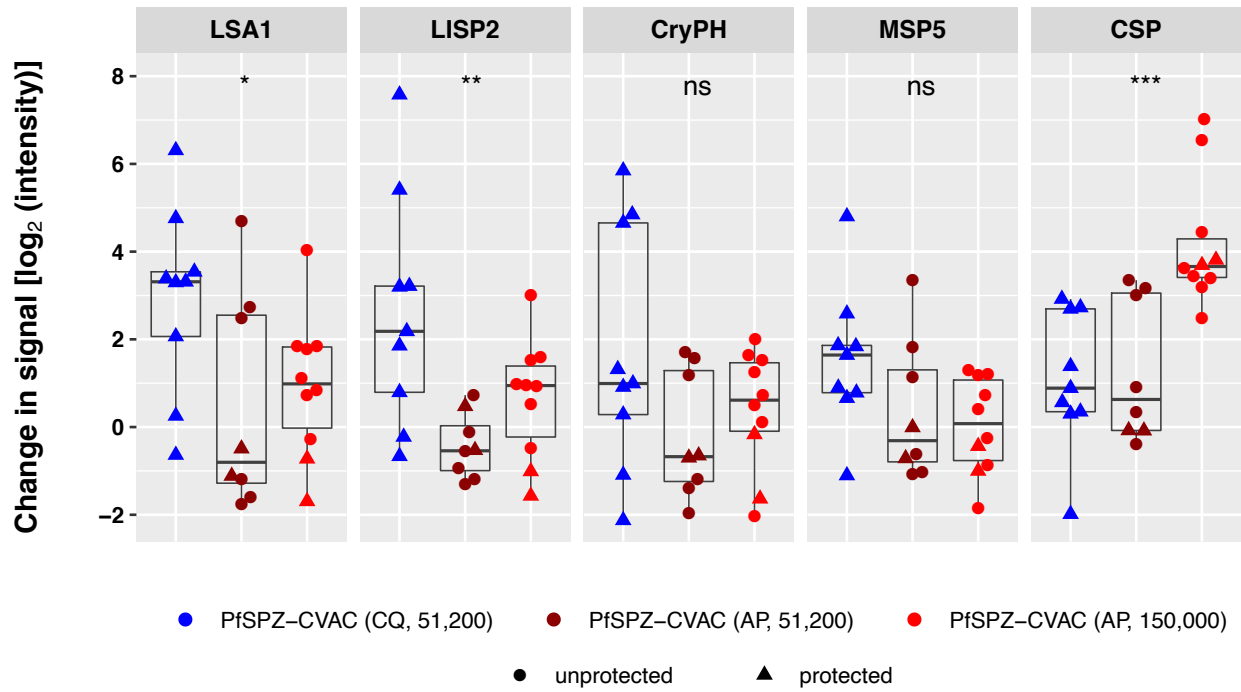

Source: https://www.biorxiv.org/content/biorxiv/early/2020/09/14/2020.09.14.296152.full.pdf
